# Supplementary material for: Achievement of the Selectivity of Cytotoxic Agents against Cancer Cells by Creation of Combined Formulation with Terpenoid Adjuvants as Prospects to Overcome Multidrug Resistance
Source: MDPI journal article supplement (doi:10.3390/ijms24098023), 2023-04-28
Supplement: s1 [file s1]

**Figure S1.** Confocal laser scanning images of A549 after 45 min incubation with Dox 5  $\mu\text{g/mL}$ : (a) free, (b) with EG, (c) with apiol, (d) with preincubated EG for 30 min, (e) with preincubated apiol for 30 min. The scale segment is 30  $\mu\text{m}$  (division value is 6  $\mu\text{m}$ ); 2 channels are shown: red, Dox; and overlay transmission light mode with Dox channel.  $\lambda_{\text{em}} = 488 \text{ nm}$  (multiline Argon laser).

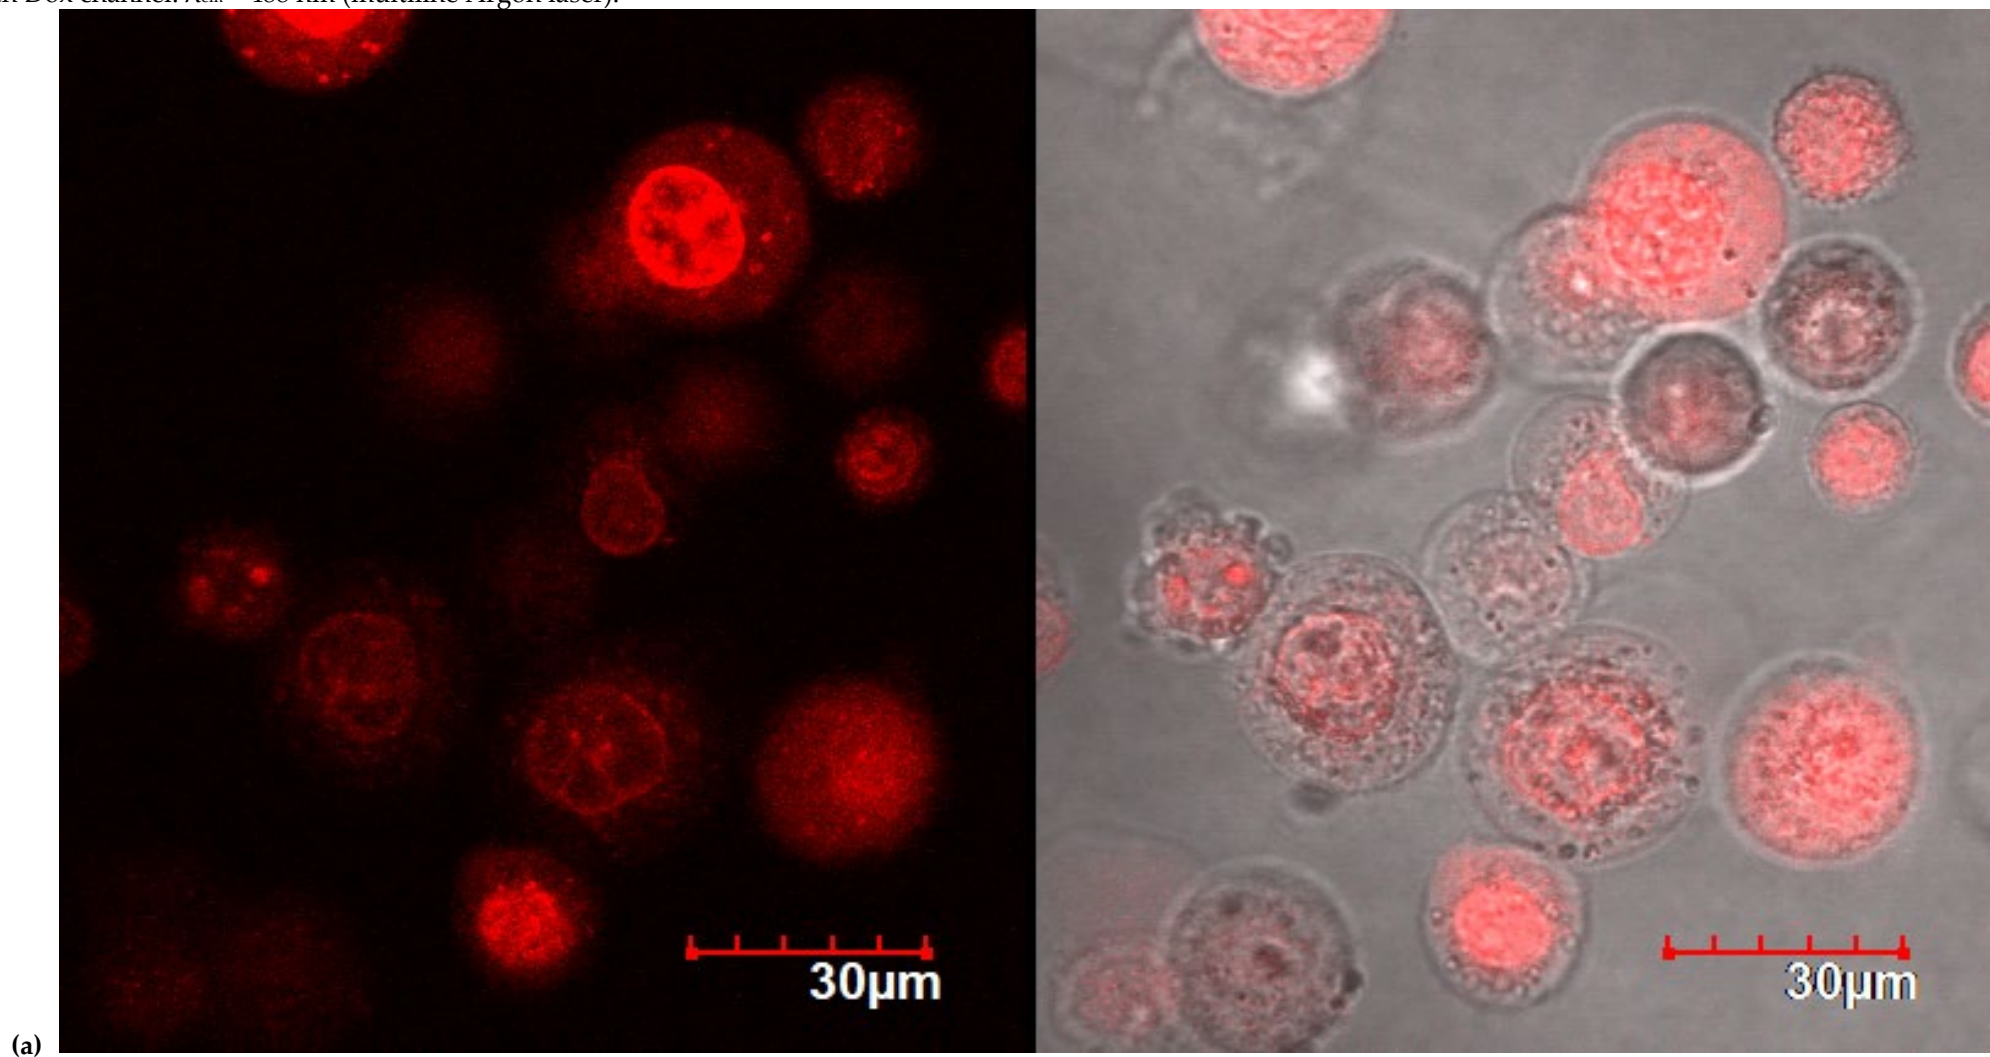

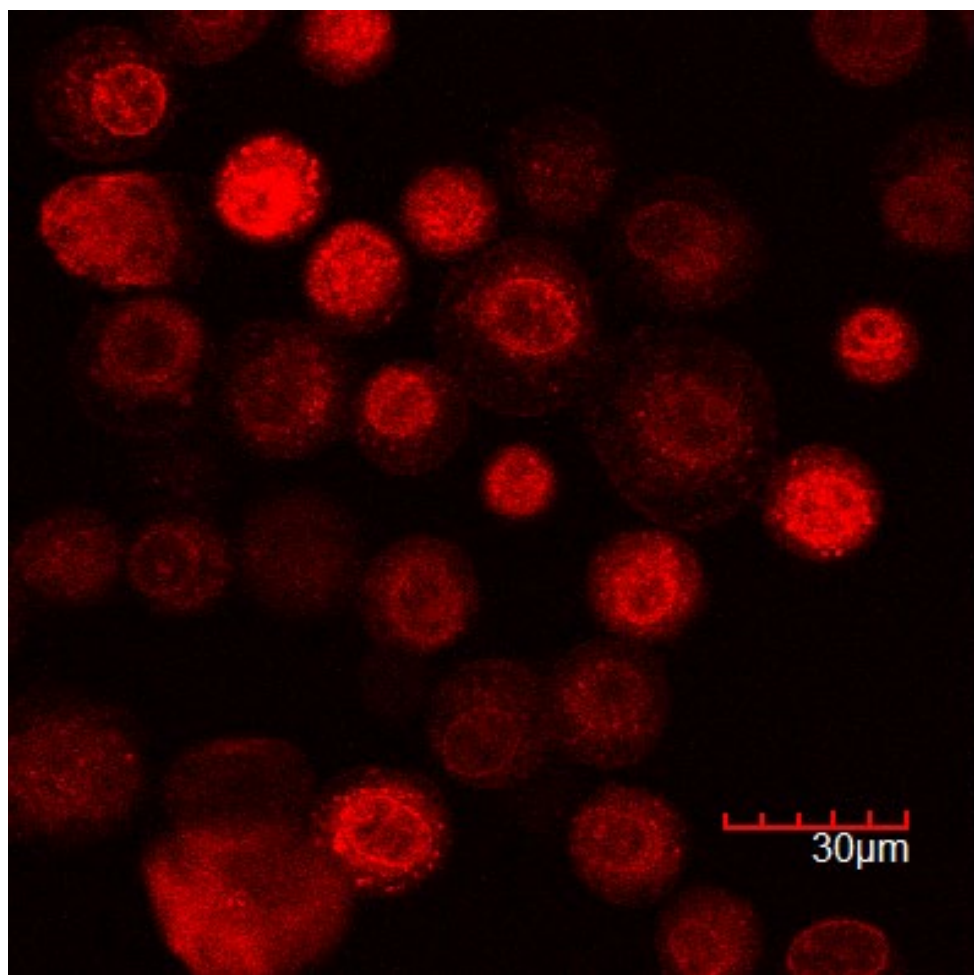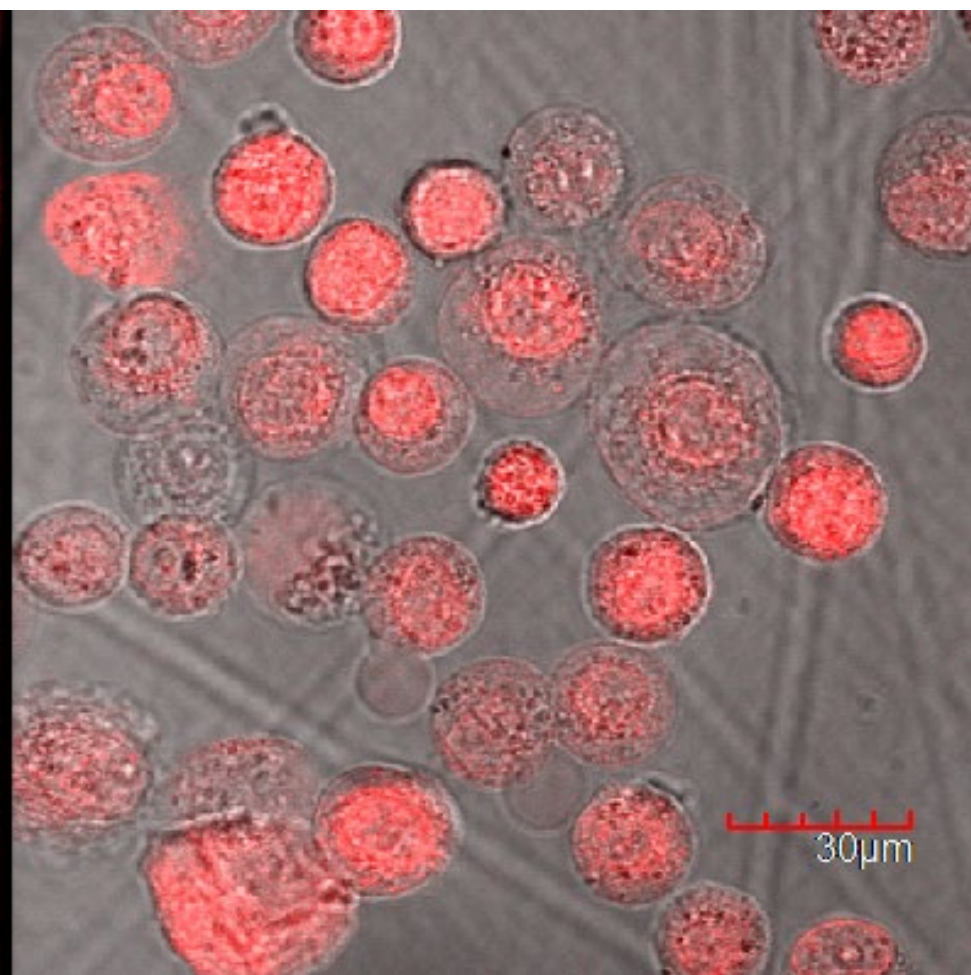

(b)



(c)

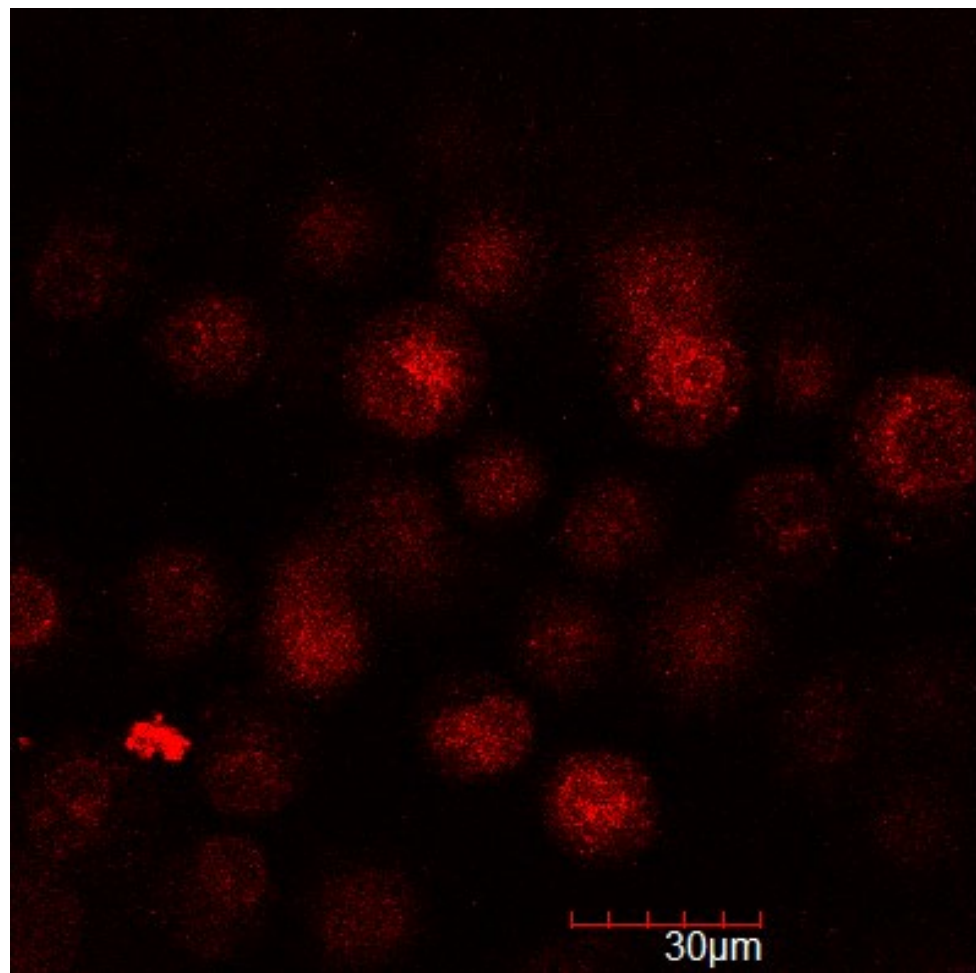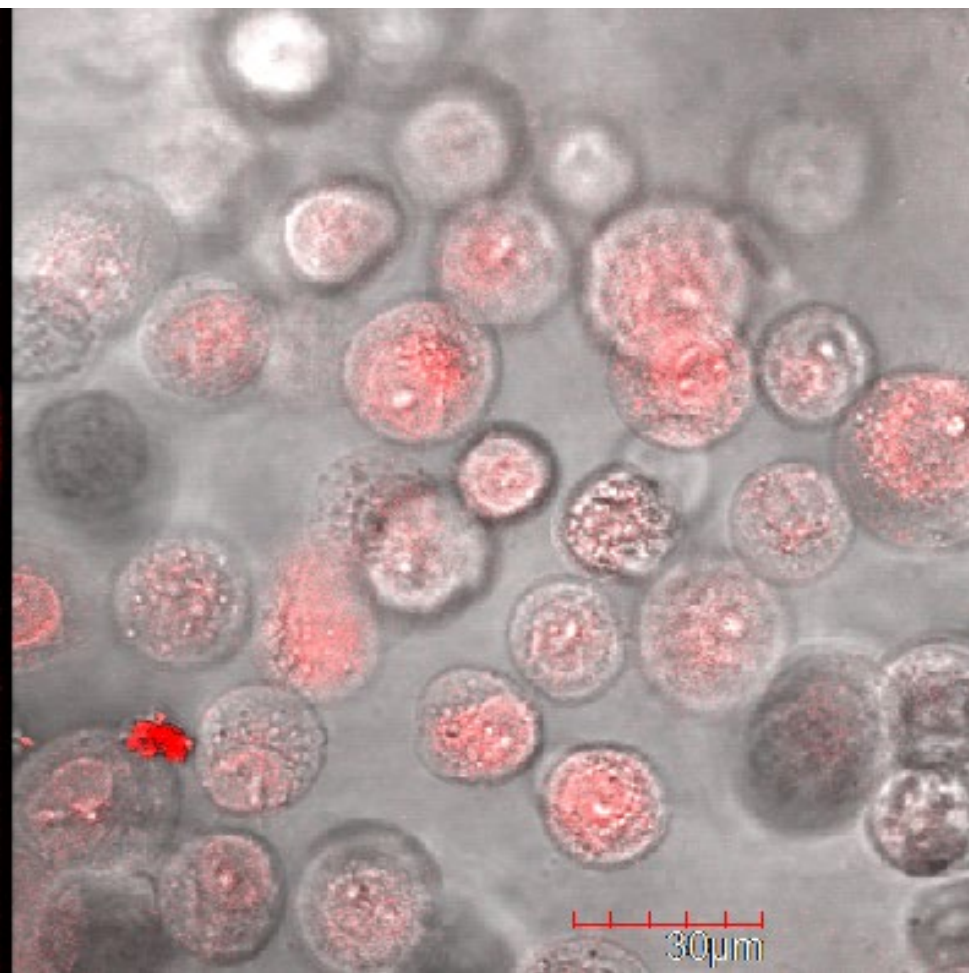

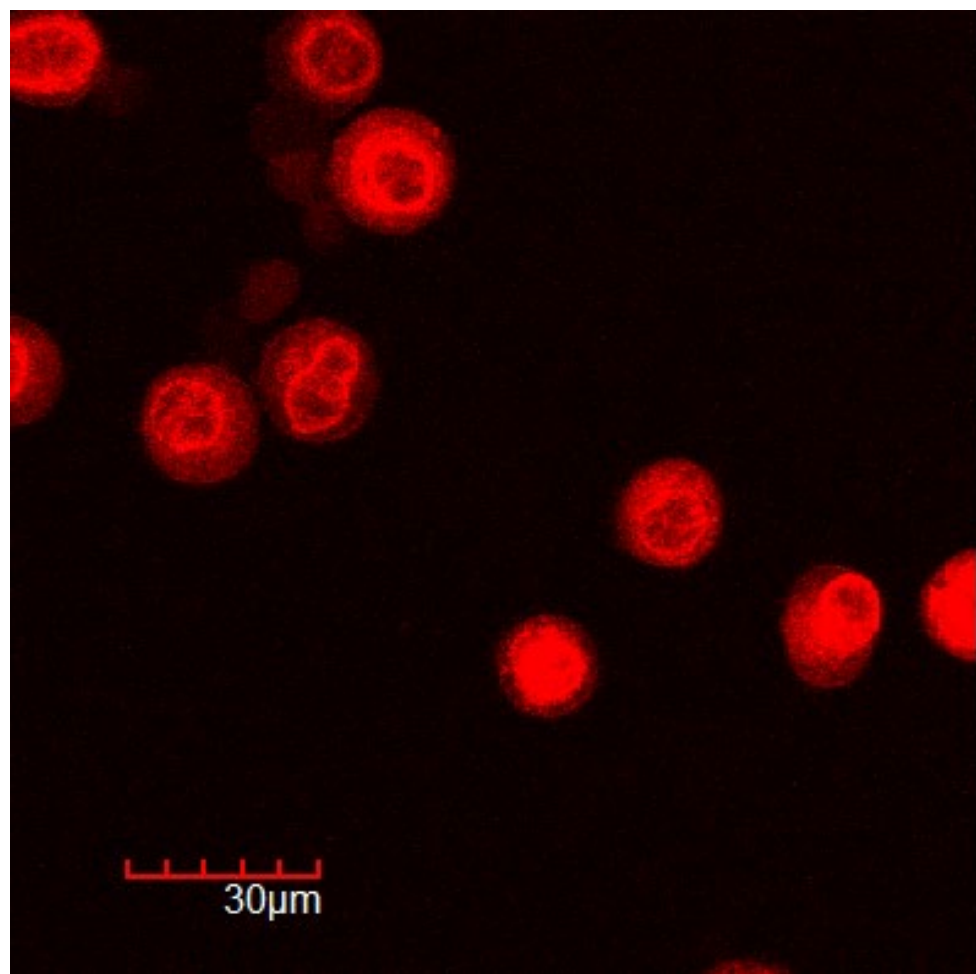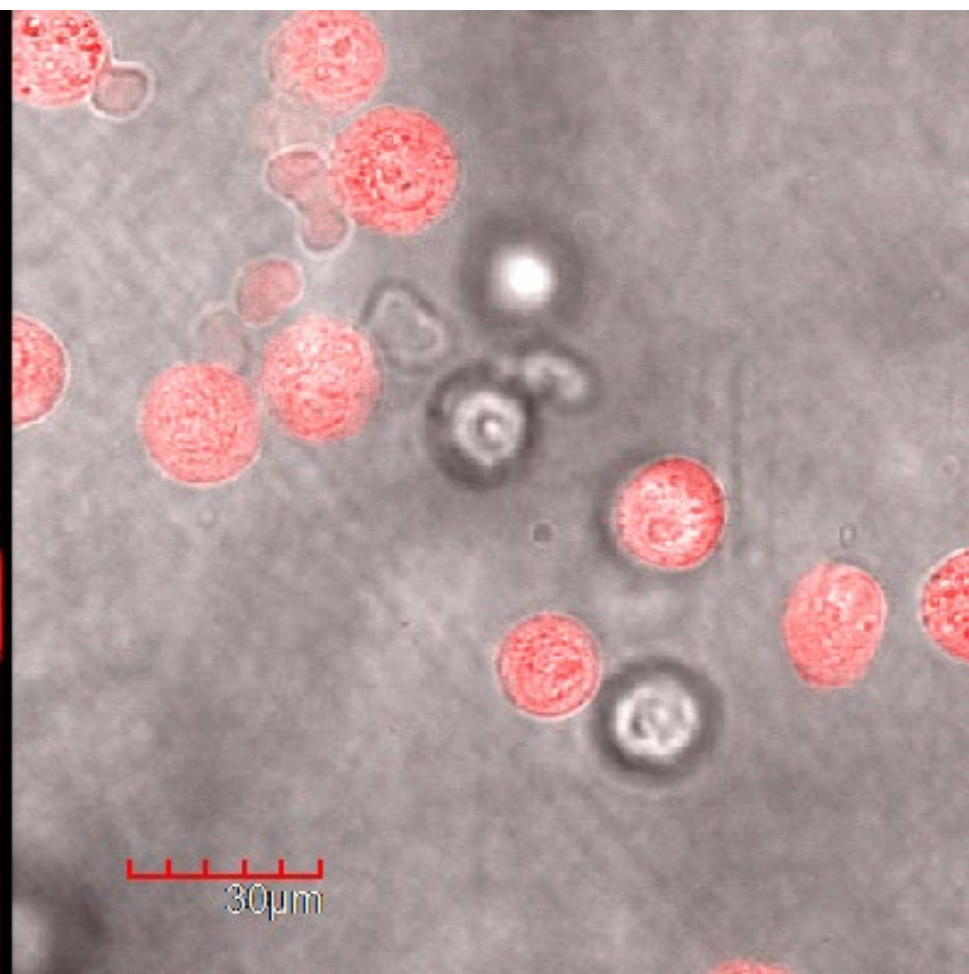

(d)

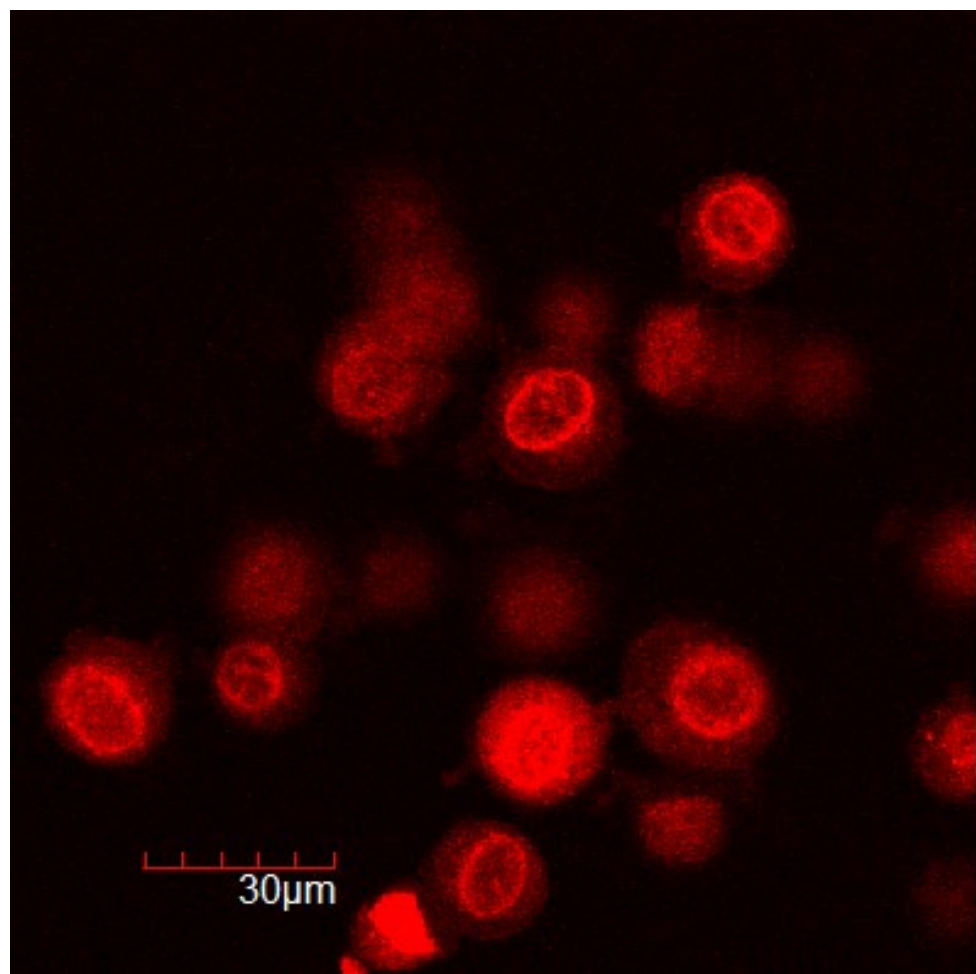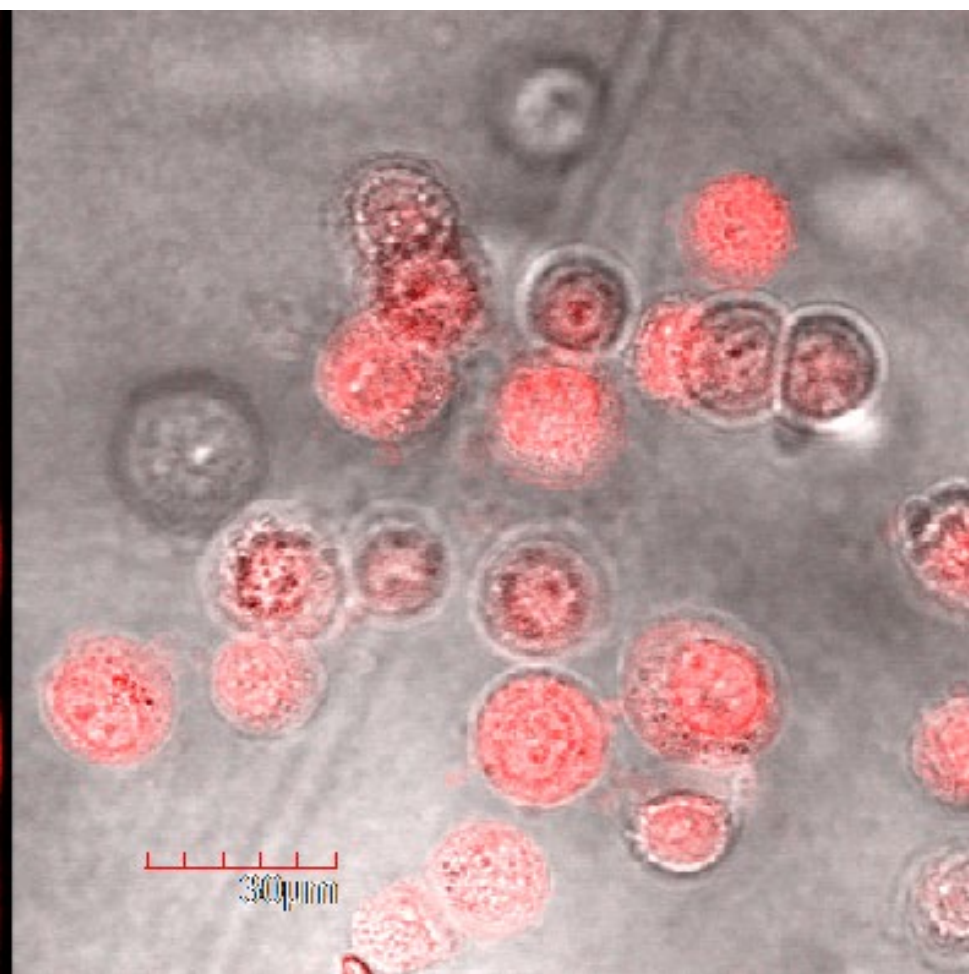

(e)



**Figure S2.** Confocal laser scanning images of A549 after 120 min incubation with Dox 5  $\mu\text{g/mL}$ : (a) free, (b) with EG, (c) with apiol, (d) with preincubated EG for 30 min, (e) with preincubated apiol for 30 min. The scale segment is 30  $\mu\text{m}$  (division value is 6  $\mu\text{m}$ ); 2 channels are shown: red, Dox; and overlay transmission light mode with Dox channel.  $\lambda_{\text{em}} = 488 \text{ nm}$  (multiline Argon laser).

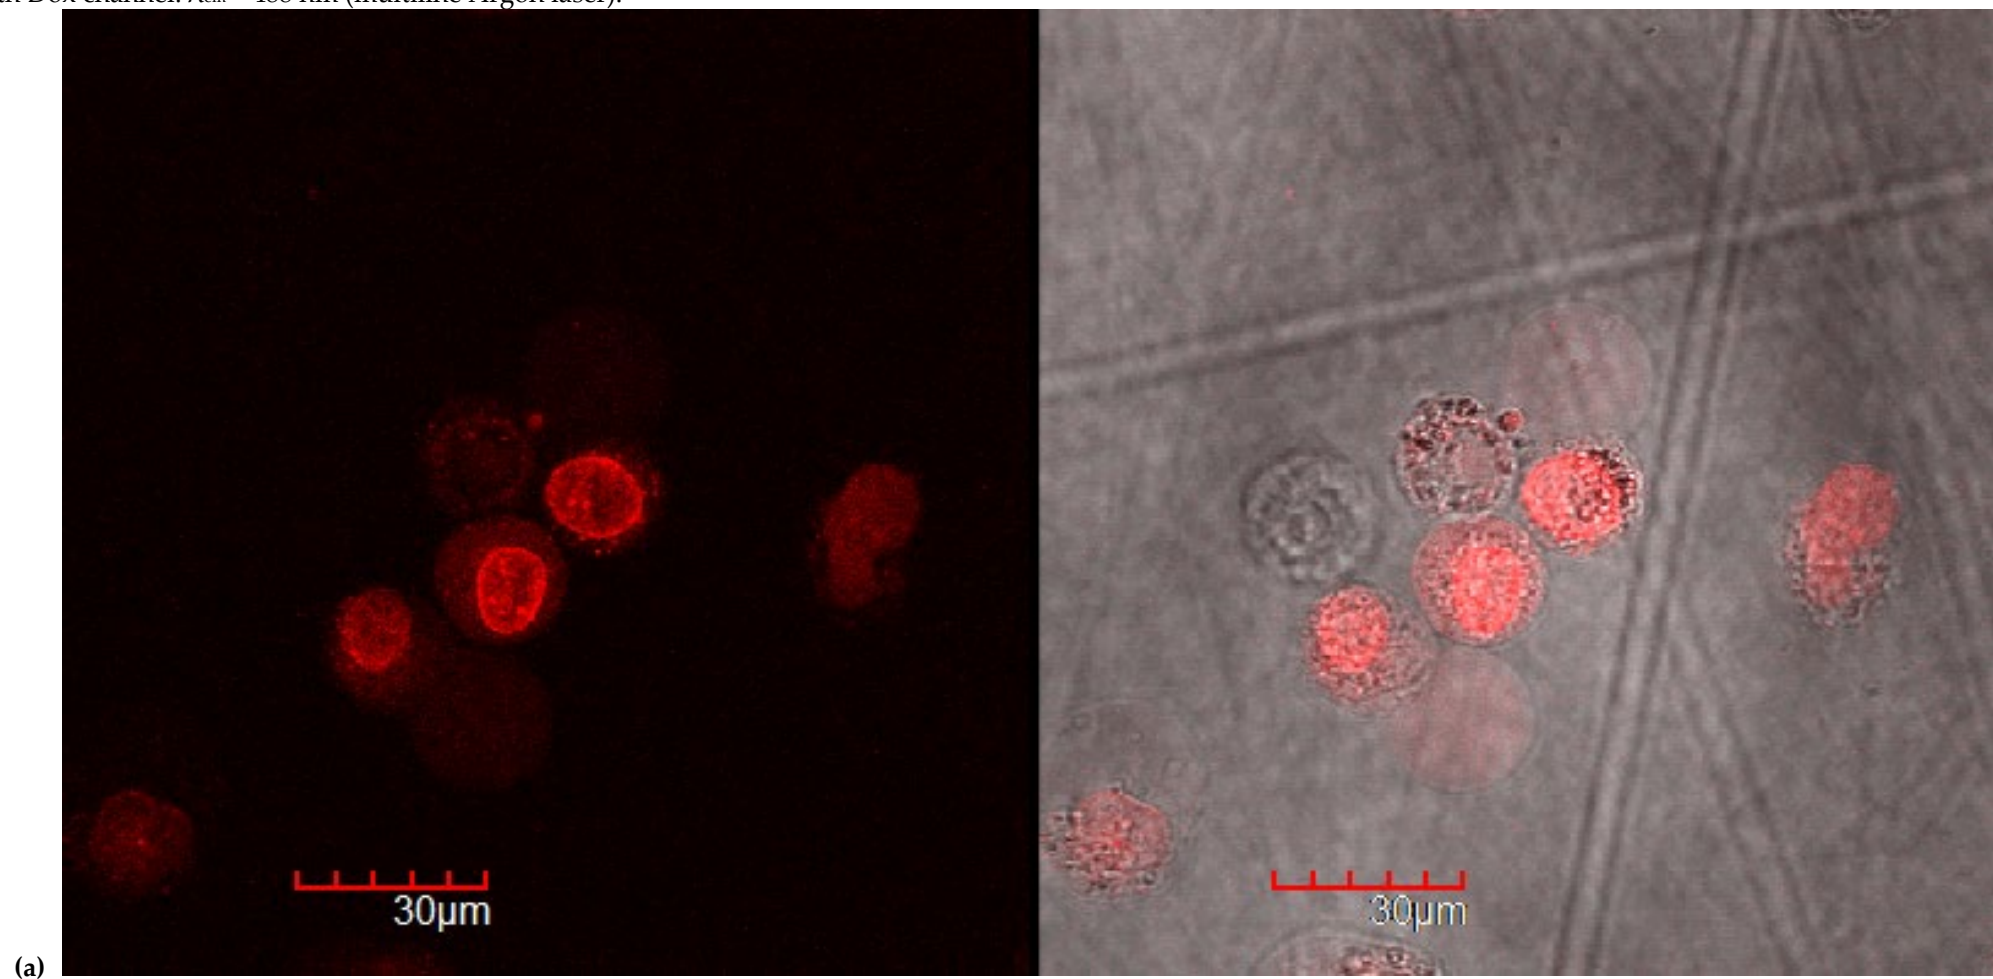

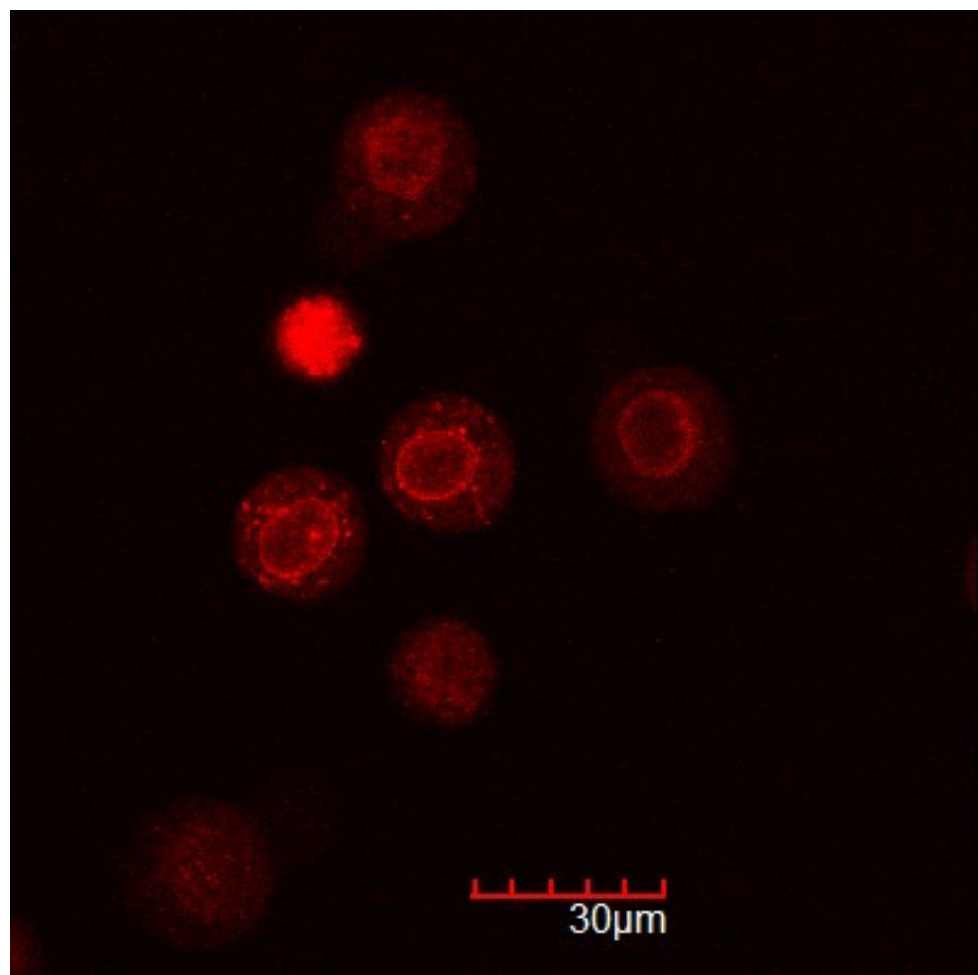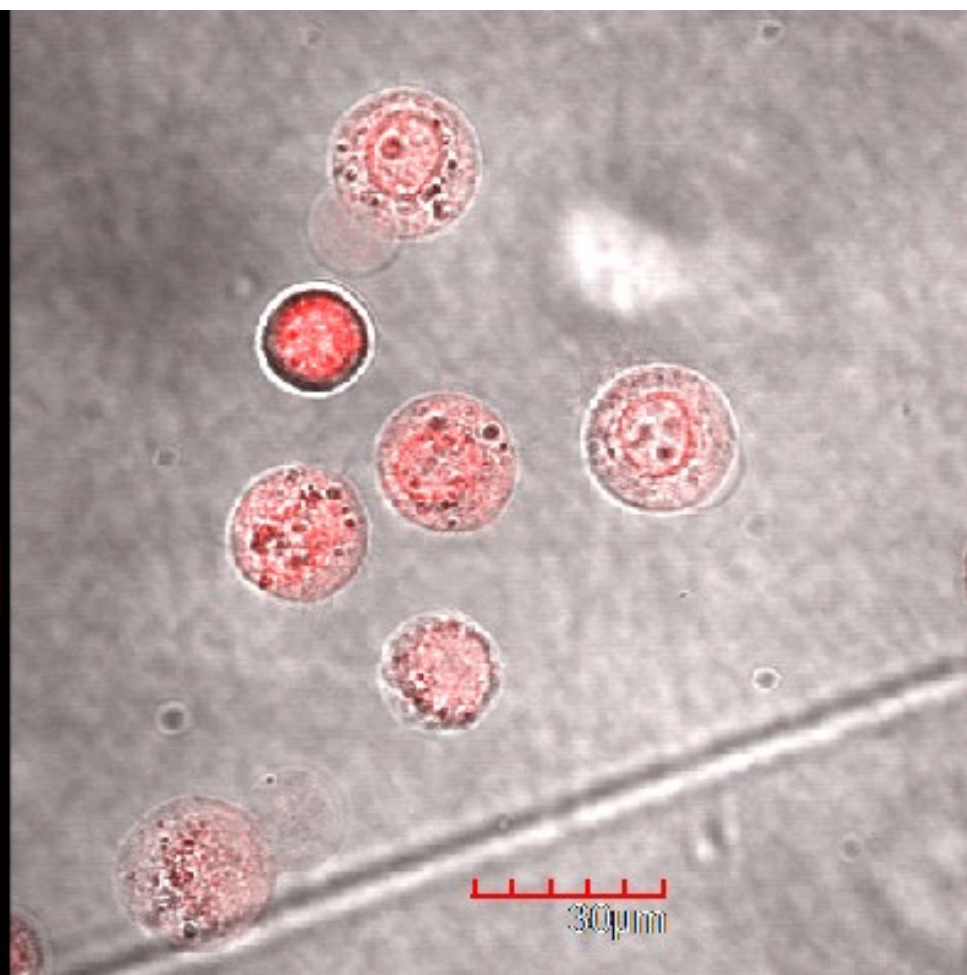

(b)

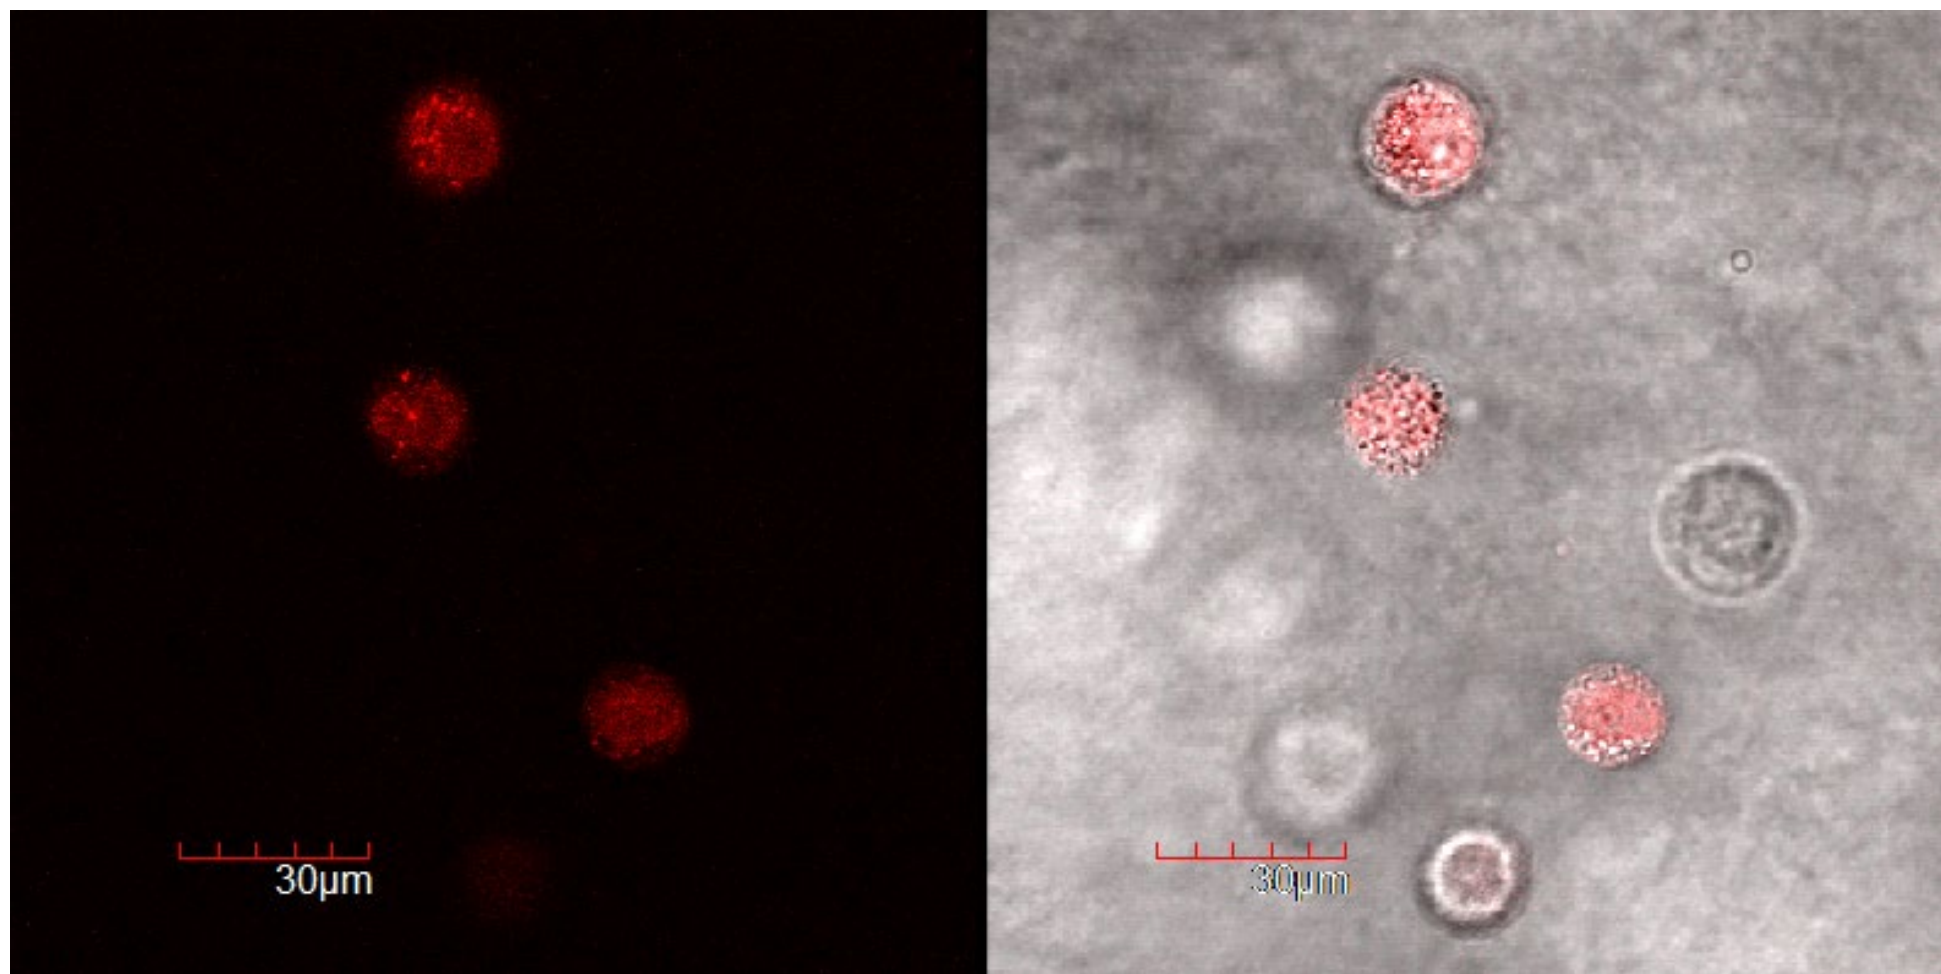

(c)



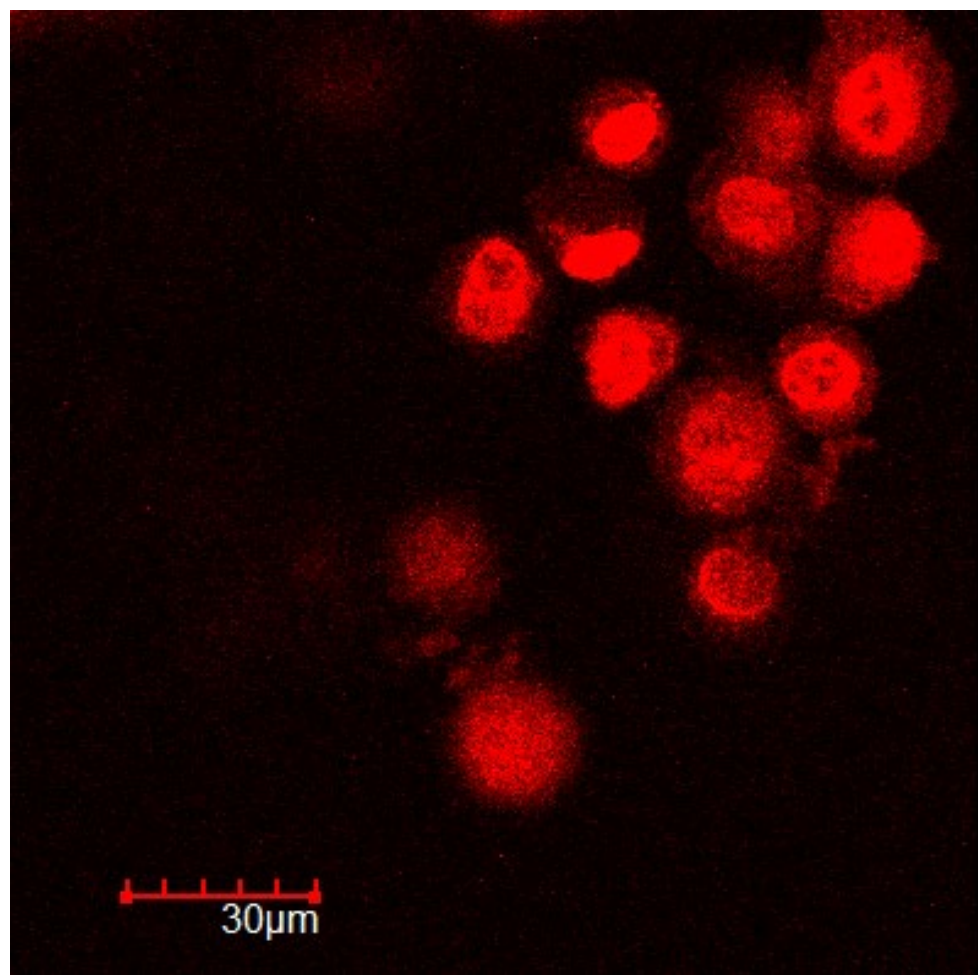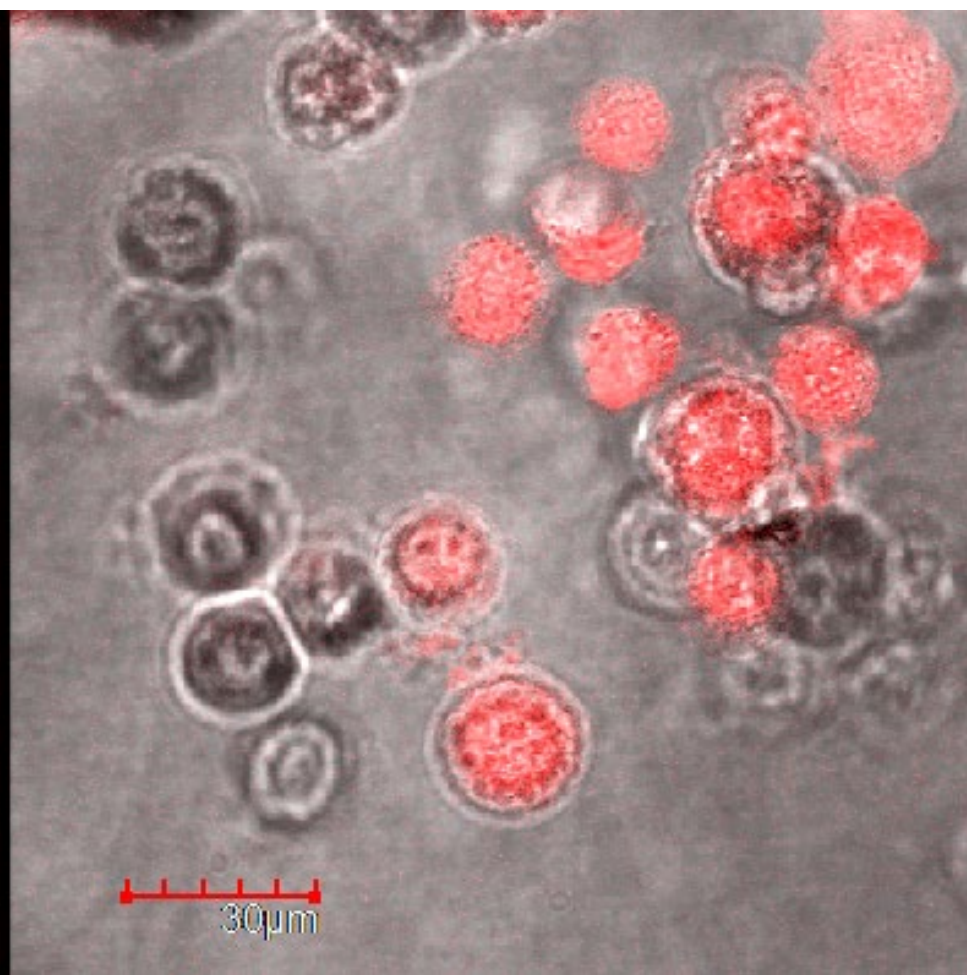

(d)

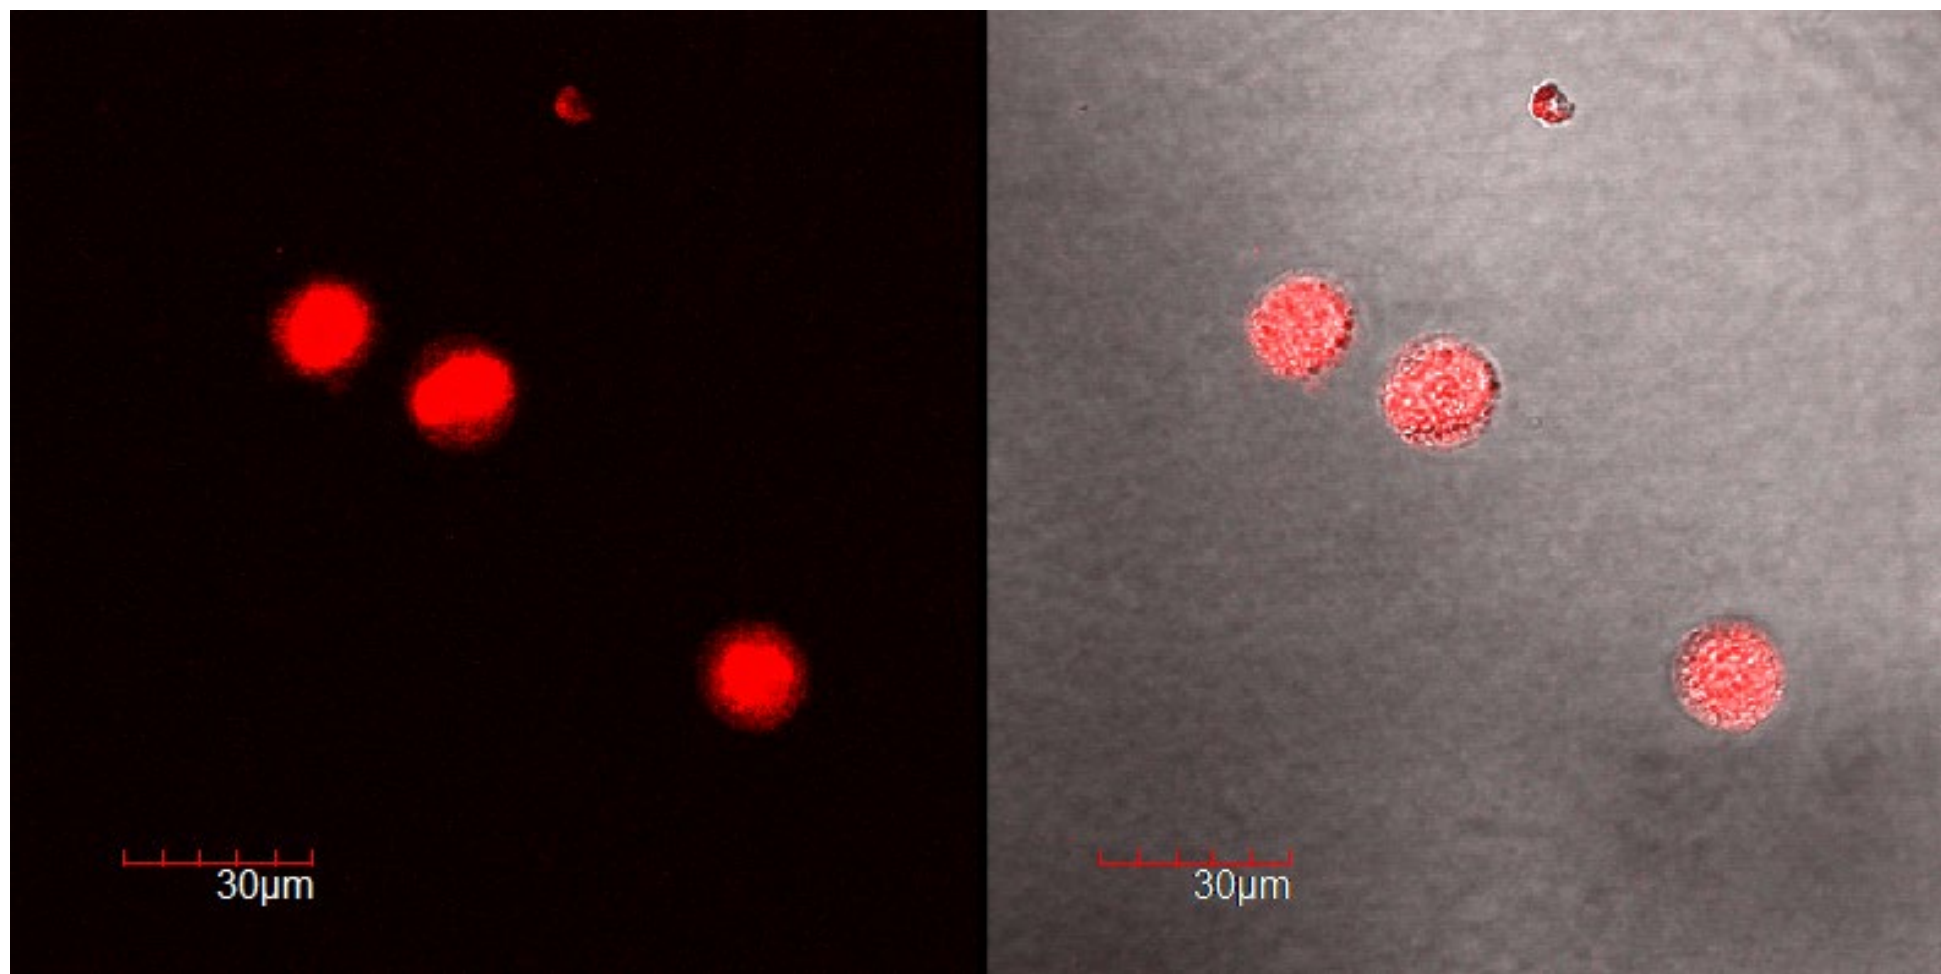

(e)
